# Supplementary material for: Impact of the COVID-19 Pandemic on HPV Vaccinations in Switzerland and Greece: Road to Recovery
Source: MDPI journal article supplement (doi:10.3390/vaccines11020258), 2023-01-25
Supplement: s1 [file s1]

## Supplementary data

**Table S1.** Model parameters by country

|                                                      | Switzerland          | Greece      |
|------------------------------------------------------|----------------------|-------------|
| Data source                                          | IQVIA data [24]      | Data source |
| Targeted population                                  | Girls and boys       | Girls       |
| Average doses per month during reference year (2019) | 14,596               | 11,886      |
| <b>Covid-19 related periods</b>                      |                      |             |
| Start of the COVID-19 period                         | 03/2020              | 03/2020     |
| Transition period                                    | 01/2021 <sup>1</sup> | 03/2022     |
| Start of catch-up period                             | 03/2022              | 09/2022     |

<sup>1</sup> A gradual increase in the number of vaccine doses disseminated in Switzerland was already observed in 2021 and was assumed to continue until the start of the catch-up period.

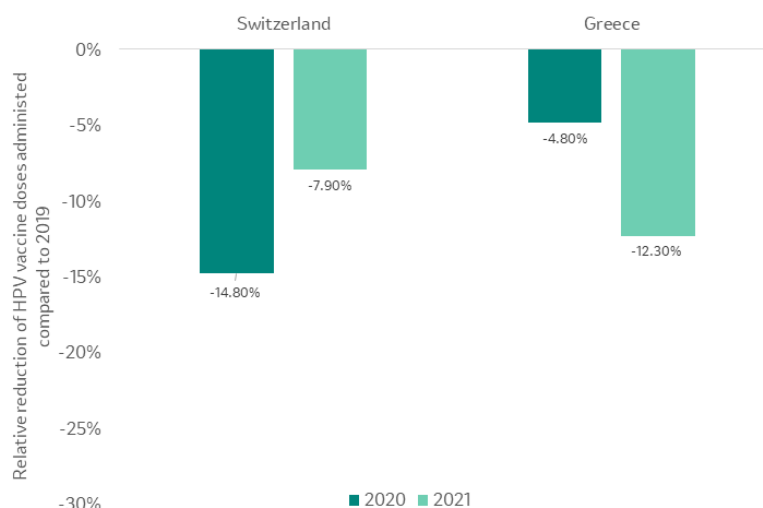

**Figure S1.** Relative reduction in the number of vaccine doses administered in 2020/2021

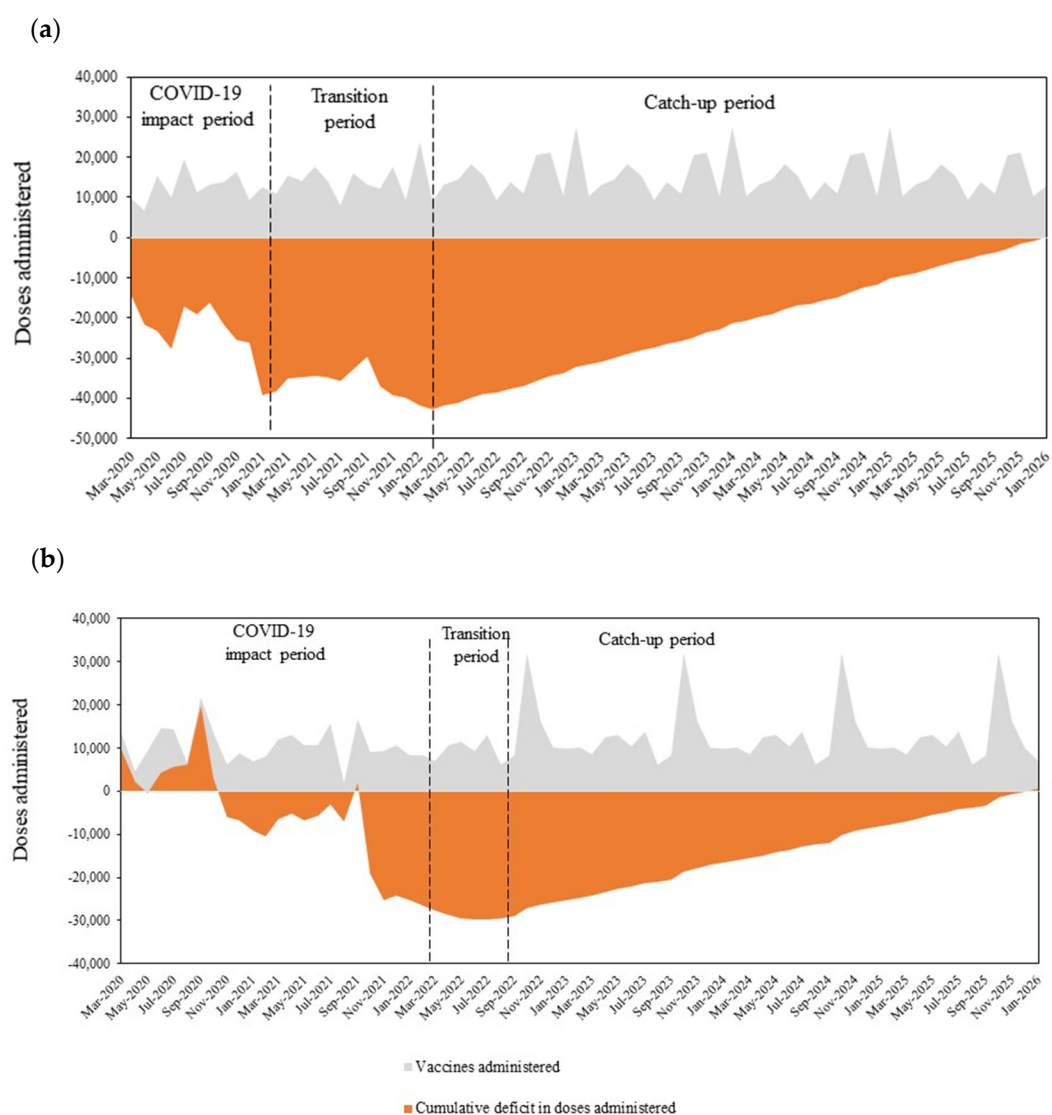

**Figure S2.** Deficits in vaccine doses administered due to the COVID-19 pandemic and model predictions for clearing the cumulative HPV deficit by the end of 2025 (pessimistic scenario) (a) Switzerland and (b) Greece.

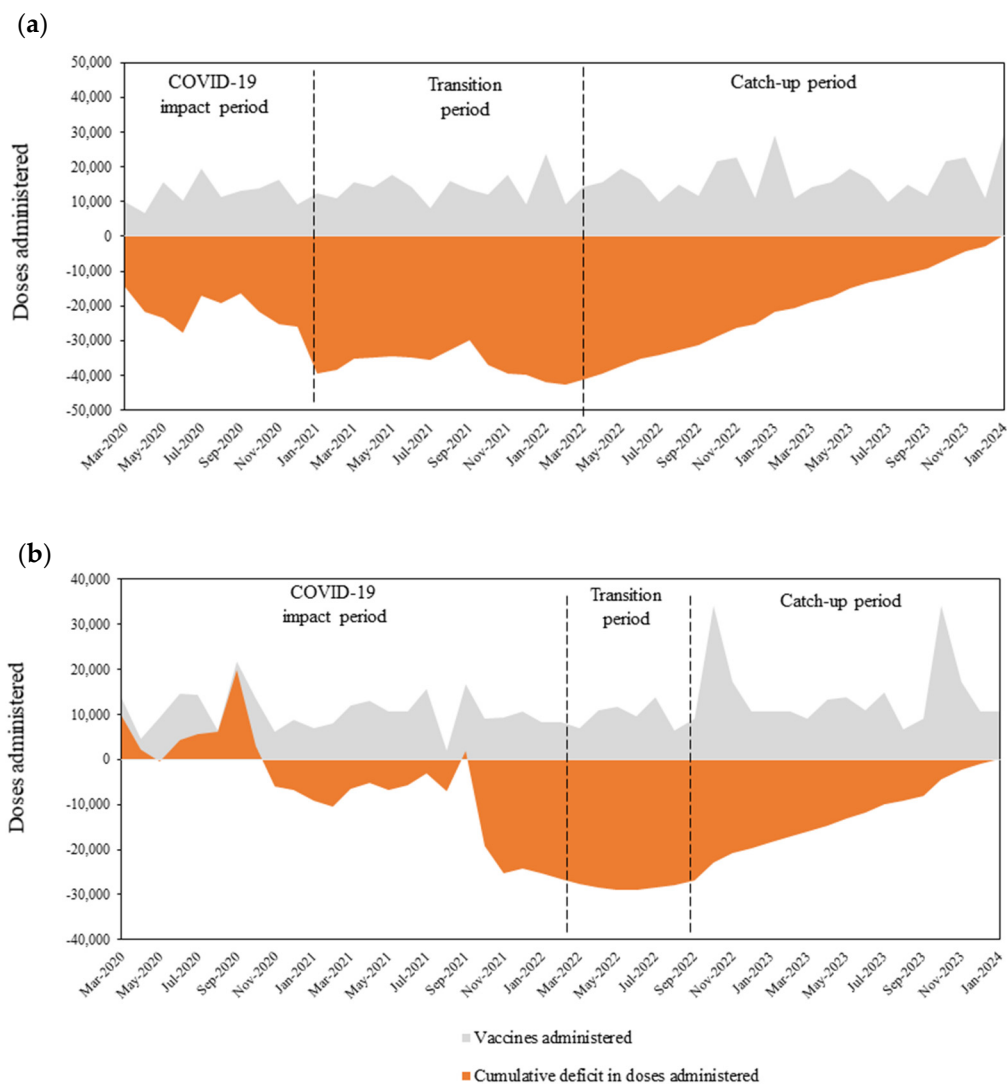

**Figure S3.** Deficits in vaccine doses administered due to the COVID-19 pandemic and model predictions for clearing the cumulative HPV deficit by the end of 2023 (optimistic scenario) (a) Switzerland and (b) Greece.
